# Supplementary material for: Cobalt iron phosphide nanoparticles embedded within a carbon matrix as highly efficient electrocatalysts for the oxygen evolution reaction
Source: Royal Society of Chemistry journal article supplement (doi:10.1039/c9cc03117k), 2019-01-01
Supplement: c9cc03117k1.pdf [file c9cc03117k1.pdf]

## Supporting Information

### Cobalt Iron phosphide Nanoparticles Embedded within Carbon Matrix as Highly Efficient and Durable Electrocatalyst for Oxygen Evolution Reaction

Jiang Han, †<sup>a</sup> Gen Chen, †<sup>a</sup> Xiaohe Liu,\*<sup>a</sup> Ning Zhang,<sup>a</sup> Shuquan Liang,<sup>a</sup> Renzhi Ma\*<sup>c</sup> and Guanzhou Qiu<sup>b</sup>

<sup>a</sup> State Key Laboratory of Powder Metallurgy and School of Materials Science and Engineering, Central South University, Changsha, Hunan 410083, P. R. China. Email: [liuxh@csu.edu.cn](mailto:liuxh@csu.edu.cn)

<sup>b</sup> School of Minerals Processing and Bioengineering, Central South University, Changsha, Hunan 410083, P. R. China

<sup>c</sup> International Center for Materials Nanoarchitectonics, National Institute for Materials Science, Namiki 1-1, Tsukuba, Ibaraki 305-0044, Japan. Email: [MA.Renzhi@nims.go.jp](mailto:MA.Renzhi@nims.go.jp)

## Experimental Section

*Synthesis of Co<sub>3</sub>Fe layered double hydroxides.* Co<sub>3</sub>Fe LDHs were synthesized through our previously reported topochemical oxidation method<sup>24</sup>. Briefly, 2.5 mmol of CoCl<sub>2</sub>·6H<sub>2</sub>O and FeCl<sub>2</sub>·4H<sub>2</sub>O with the Co:Fe ratio at 3:1, anthraquinone-2-sulfonic acid sodium salt monohydrate (AQS2, 5/3 mmol) and hexamethylenetetramine (HMT, 20 mmol) were dissolved in 300 mL of deionized water. The solution was refluxed under continuous magnetic stirring and nitrogen gas protection for 6 h.

*Synthesis of Co<sub>3</sub>Ni hydroxides.* Layered CoNi hydroxides were synthesized through the same method as the above except replacing a quarter of FeCl<sub>2</sub>·4H<sub>2</sub>O with NiCl<sub>2</sub>·6H<sub>2</sub>O. Briefly, 2.5 mmol of CoCl<sub>2</sub>·6H<sub>2</sub>O and NiCl<sub>2</sub>·6H<sub>2</sub>O with the ratio of Co and Ni ratio at 3:1, anthraquinone-2-sulfonic acid sodium salt monohydrate (AQS2, 5/3 mmol) and hexamethylenetetramine (HMT, 20 mmol) were dissolved in 300

mL of deionized water. The solution was refluxed under continuous magnetic stirring and nitrogen gas protection for 6 h.

*Synthesis of layered Co hydroxides.* Layered Co hydroxides were synthesized through the same method as the above except replacing a quarter of  $\text{FeCl}_2 \cdot 4\text{H}_2\text{O}$  with  $\text{CoCl}_2 \cdot 6\text{H}_2\text{O}$ .

*Synthesis of layered CoFe hydroxides without intercalating AQS.* The sample was synthesized via the same method as the fabricating intercalated  $\text{Co}_3\text{Fe}$  layered double hydroxides except not adding AQS2.

*Synthesis of  $\text{Co}_3\text{Fe}$  phosphide,  $\text{Co}_3\text{Ni}$  phosphide, Co phosphide and  $\text{Co}_3\text{Fe}$  phosphide without carbon matrix.* To prepare cobalt iron phosphide, the obtained  $\text{Co}_3\text{Fe}$  LDH powder was placed into two separate positions in a quartz tube with a corundum boat loading of 0.6 g of  $\text{NaH}_2\text{PO}_2$  at the upstream side of the furnace. The mass ratio of LDH and  $\text{NaH}_2\text{PO}_2$  is 1:8. Subsequently, the samples were heated at 360 °C for 120 min in a static Ar atmosphere, and then naturally cooled to ambient temperature under Ar. The methods of fabricating  $\text{Co}_3\text{Ni}$  phosphide, Co phosphide and  $\text{Co}_3\text{Fe}$  phosphide without carbon matrix are similar with the above mentioned.

*Characterizations.* The morphology of as-obtained products was investigated by scanning electron microscope (SEM, Hitachi, S-4800) and transmission electron microscope (TEM, FEI Tecnai F20). SEAD, EELS, STEM, TEM and HRTEM images were all recorded on a FEI Tecnai F20. The crystal structures of the products were characterized using powder X-ray diffraction (XRD, Bruker D8 Advance diffractometer,  $\text{Cu K}\alpha 1$ ). The X-ray photoelectron spectroscopy (XPS) analysis was performed on an ESCALAB250Xi X-ray photoelectron spectrometer using Mg as the excitation source. The element content was tested by ICP-AES (Optima 5300).

*Electrochemical Measurements.*

To prepare the working electrode, a 5 mg portion of catalyst powder was dispersed in a mixed water and ethanol (1:1, v/v) solution (1 mL), and then 5  $\mu\text{L}$  of Nafion solution (5 wt %) was added. The suspension was treated in an ultrasonic bath for 30 min and stirred for 8 h to prepare a homogeneous ink. The working electrode was prepared by dripping the catalyst ink onto a glassy carbon electrode with a diameter of 3 mm (catalyst loading  $0.27 \text{ mg cm}^{-2}$ ), and subsequent drying at  $80 \text{ }^\circ\text{C}$  for 6 h. Electrochemical characterizations were performed on a CHI760E (CH Instrument, Shanghai, China) electrochemical workstation using 1 M KOH as an electrolyte. A platinum wire was used as the counter electrode, while a saturated calomel electrode (SCE) acted as the reference electrode. The catalyst film coated rotating disk electrode (RDE, diameter: 3 mm) were used as the working electrode. During the measurements, the working electrode was constantly rotated at 1600 rpm to remove generated  $\text{O}_2$ . To evaluate the stability of CFP/C-2 electrode during OER process, galvanostatic measurements were performed at a current density of  $10 \text{ mA cm}^{-2}$ .

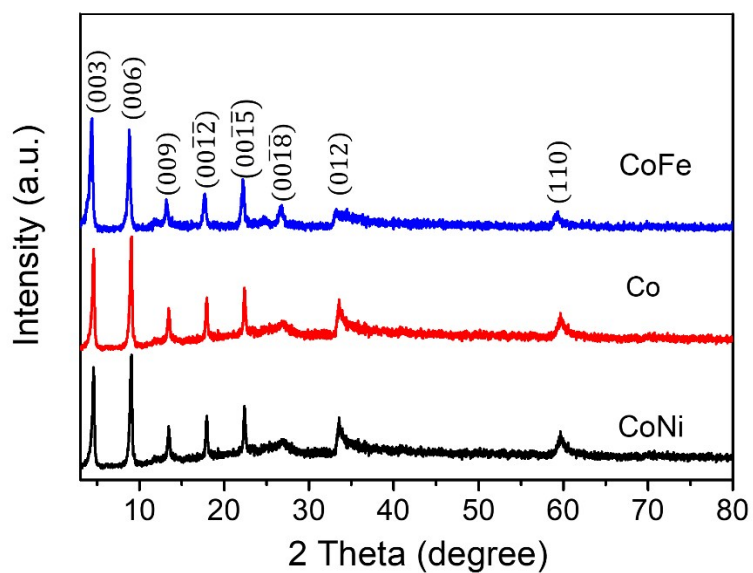

**Figure S1.** The XRD pattern of AQS2-intercalated  $\text{Co}_3\text{FeLDHs}$ ,  $\text{Co}_3\text{Ni LDHs}$  and  $\text{Co LDHs}$ .

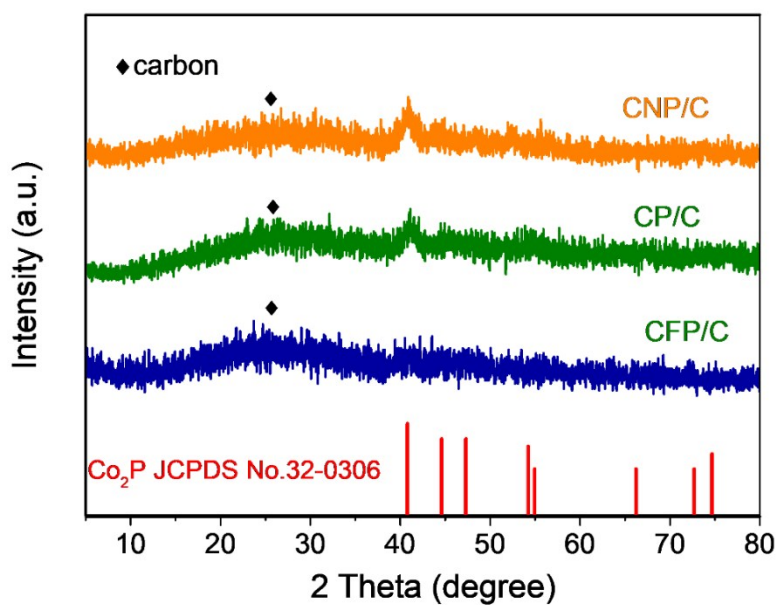

**Figure S2.** XRD patterns of as-prepared CFP/C, CNP/C and CP/C nanocomposites.

$\text{Co}_3\text{FeP}_x/\text{C}$  (the samples are labelled as CFP/C) nanocomposites are obtained via a one-step phosphorization of AQS2-intercalated  $\text{Co}_3\text{Fe LDHs}$  using sodium hypophosphite monohydrate as the

phosphorus source. The  $\text{Co}_3\text{Fe}$  LDH transformed into  $\text{Co}_3\text{FeP}_x$  nanoparticles embedded in carbon was derived via phosphorization at  $360\text{ }^\circ\text{C}$ . The process contributes to the carbonization of intercalated AQS2.  $\text{Co}_3\text{NiP}_x/\text{C}$  are labelled as CNP/C.

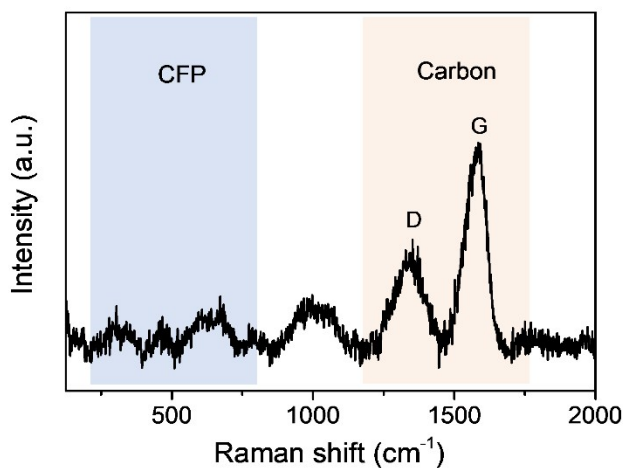

**Figure S3.** Raman spectra of as-prepared CFP/C nanocomposites.

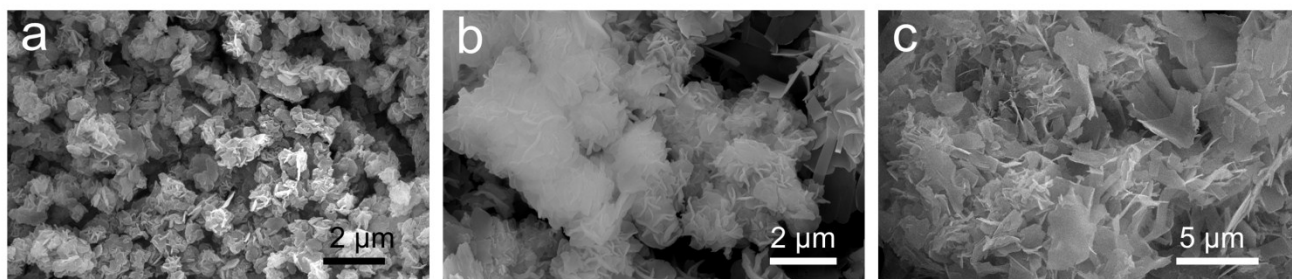

**Figure S4.** The SEM of the hierarchical structured (a)  $\text{Co}_3\text{Fe}$  LDHs, (b)  $\text{Co}_3\text{Ni}$  LDHs and (c) CoLDHsmicroflowers assembled from nanoplates.

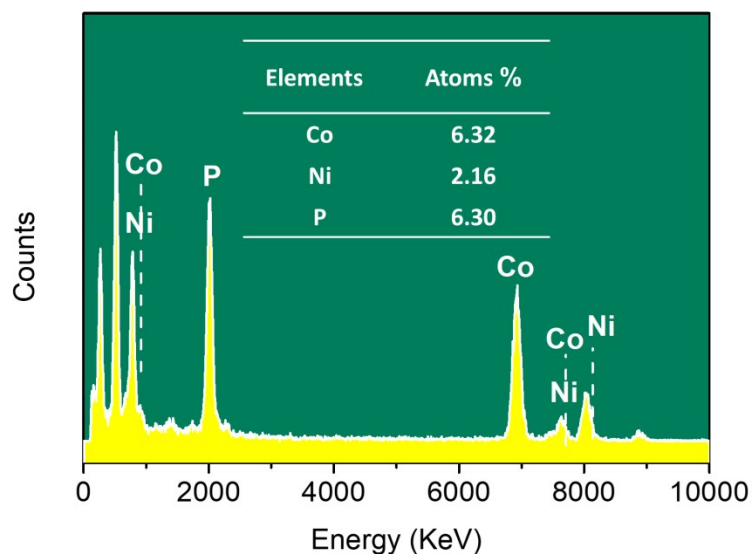

**Figure S5.** The XPS spectra of survey scan of as-prepared CNP/C.

On the basis of the results of energy dispersive spectroscopy (EDS) and inductively coupled plasma-atomic emission spectroscopy (ICP-AES) (Table S1, ESI†), the chemical composition of the asprepared Fe incorporated Co<sub>2</sub>P/C is (anal. calcd: the mole ratio of Co: Fe = 3:1). The EDS image of CNP/C in Fig. S5 (ESI†) shows a mole ratio of Co:Ni = 3:1.

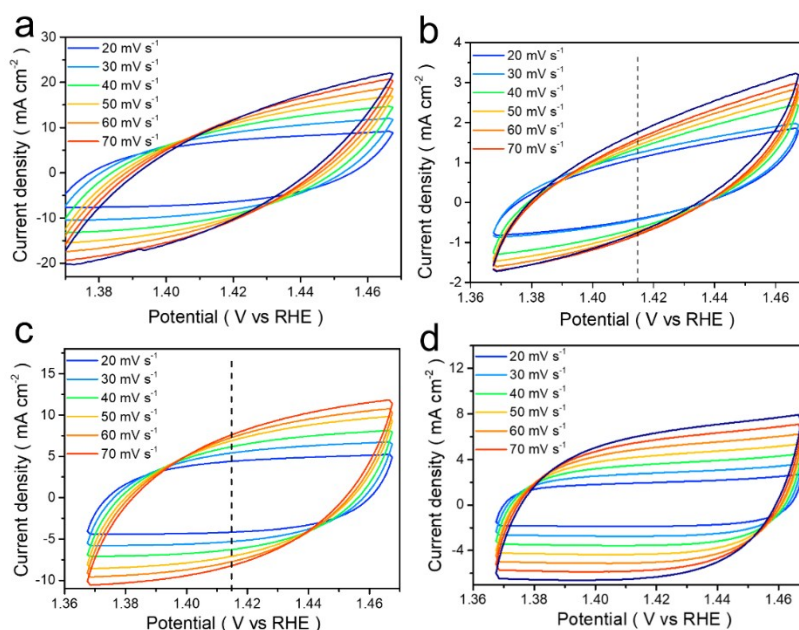

**Figure S6.** The cyclic voltammogram (CV) curves of (a) Co<sub>3</sub>Fe LDHs, (b) CFP/C, (c) CNP/C and (d) CP/C.

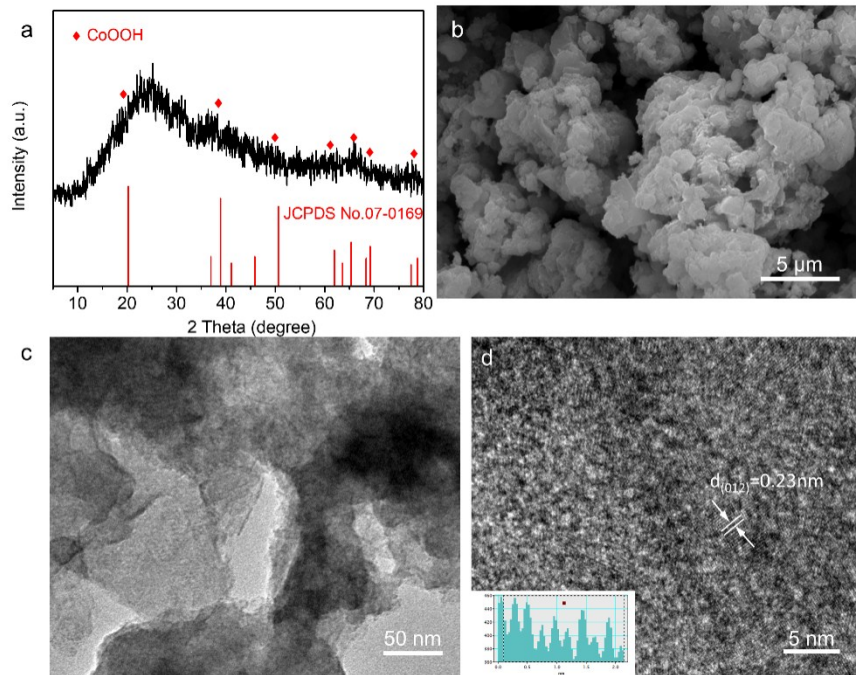

**Figure S7.** The XRD (a), SEM (b), TEM (c) and HRTEM (d) of CFP/C after OER.

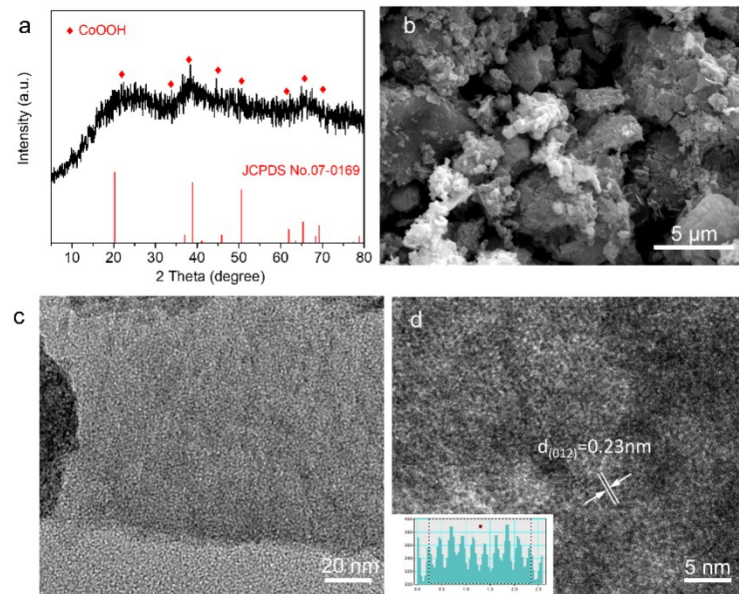

**Figure S8.** The XRD (a), SEM (b), TEM (c) and HRTEM (d) of CNP/C after OER.



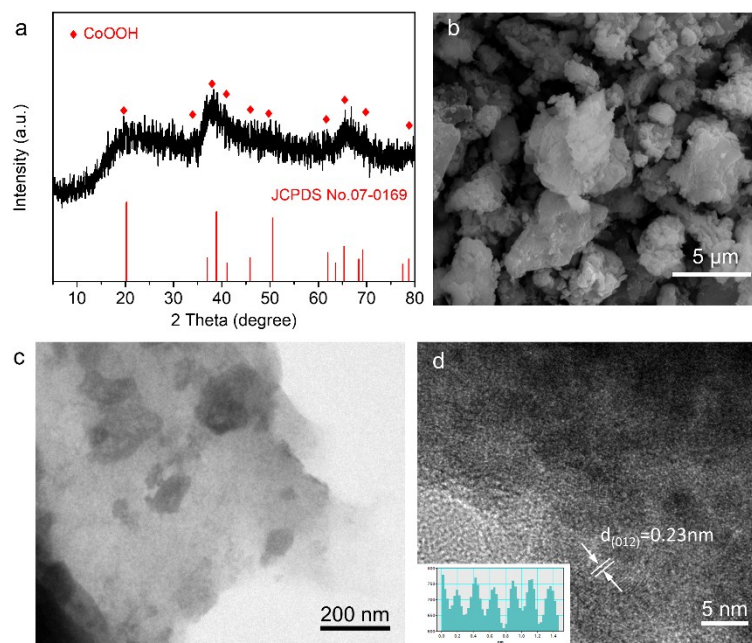

**Figure S9.** The XRD (a), SEM (b), TEM (c) and HRTEM (d) of CP/C after OER.

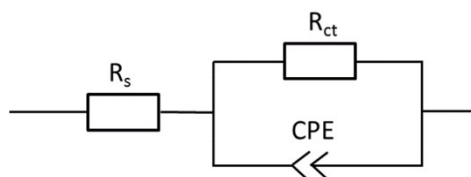

**Figure S10.** Equivalent circuit model used in impedance analysis of as-prepared CFP/C.



**Table S1.** Mental element content based on ICP-AES

| Samples | Co (wt%) | Fe (wt%) |
|---------|----------|----------|
| CFP/C   | 26.57%   | 9.32%    |

**Table S2.** Comparison of phosphide catalysts for oxygen evolution reaction recently reported.

| Catalysts            | Electrolyte | Substrate     | Current density (mA cm <sup>-2</sup> ) | Overpotential (mV) at the corresponding current density | Reference           |
|----------------------|-------------|---------------|----------------------------------------|---------------------------------------------------------|---------------------|
| CFP/C                | 1 M KOH     | Glassy carbon | 10                                     | 260                                                     | This work           |
| NiCoP/C nanoboxes    | 1 M KOH     | Glassy carbon | 10                                     | 330                                                     | Ref. S <sup>1</sup> |
| CoP                  | 1 M KOH     | Glassy carbon | 10                                     | 320                                                     | Ref. S <sup>2</sup> |
| Ni <sub>2</sub> P    | 1 M KOH     | Glassy carbon | 10                                     | 320                                                     | Ref. S <sup>3</sup> |
| Co/Co <sub>2</sub> P | 1 M KOH     | Nickel foam   | 10                                     | 390                                                     | Ref. S <sup>4</sup> |
| CoP                  | 1 M KOH     | arbon cloth   | 10                                     | 281                                                     | Ref. S <sup>5</sup> |
| Ni-P                 | 1 M KOH     | arbon cloth   | 10                                     | 300                                                     | Ref. S <sup>6</sup> |
| CoP                  | 1 M KOH     | Glassy carbon | 10                                     | 345                                                     | Ref. S <sup>7</sup> |

**Table S3.** Optimum fitting parameters for the impedance spectra shown in Figure 5d ( $R_s$  and  $R_{ct}$  represents solution resistance and material intrinsic resistance, respectively).

| Catalyst               | $R_s$ ( $\Omega$ ) | $R_{ct}$ ( $\Omega$ ) |
|------------------------|--------------------|-----------------------|
| CFP/C                  | 12.09              | 30.61                 |
| Co <sub>3</sub> FeLDHs | 12.16              | 106.70                |
| CNP/C                  | 16.27              | 33.07                 |
| CP/C                   | 12.96              | 97.10                 |

## Reference

1. P. He, X.-Y. Yu and X. W. Lou, *Angew. Chem.*, 2017, **129**, 3955-3958.
2. J. Chang, Y. Xiao, M. Xiao, J. Ge, C. Liu and W. Xing, *ACS Catal.*, 2015, **5**, 6874-6878.
3. L.-A. Stern, L. Feng, F. Song and X. Hu, *Energy Environ. Sci.*, 2015, **8**, 2347-2351.
4. J. Masa, S. Barwe, C. Andronesco, I. Sinev, A. Ruff, K. Jayaramulu, K. Elumeeva, B. Konkena, B. Roldan Cuenya and W. Schuhmann, *ACS Energy Lett.*, 2016, **1**, 1192-1198.
5. P. Wang, F. Song, R. Amal, Y. H. Ng and X. Hu, *ChemSusChem*, 2016, **9**, 472-477.
6. X.-Y. Yu, Y. Feng, B. Guan, X. W. Lou and U. Paik, *Energy Environ. Sci.*, 2016, **9**, 1246-1250.
7. R. Wu, D. P. Wang, K. Zhou, N. Srikanth, J. Wei and Z. Chen, *J. Mater. Chem. A*, 2016, **4**, 13742-13745.
